# Supplementary material
Source: publisher site journal article supplement (https://www.dovepress.com/article/515715)
Supplement: Supplementary file 1 [file get_supplementary_file.php]

**Global Insights and Key Trends in Physical Literacy Research: A Bibliometric Analysis and Literature Review from 2007 to 2024**

**Table S1** The BIBLIO checklist for reporting the bibliometric reviews of PL research

| **Section/topic** | | **Items**  **no** | **Checklist item** | **Reported on page no** |
| --- | --- | --- | --- | --- |
| **Title** | Identification | 1 | Identify the report as a bibliometric review in the title | 1 |
| Issues/topics | 2 | Indicate the key issues/topics under investigation and coverage of time period | 1 |
| **Abstract** | Structured summary | 3 | Structured summary including (as applicable): background, methods, results (key findings), and conclusions | 1-2 |
| **Introduction/background** | Justification/rationale/explanation | 4 | Present review of existing knowledge and epidemiological information | 3-5 |
| Objectives | 5 | Statement of the objective(s) or question(s) | 5 |
| **Methods** | Search engines (data sources) | 6 | Describe all information sources (such as electronic databases, contact with study authors, trial registers, or other gray literature sources) | 6 |
| Search strategy | 7 | Keywords and systematization criteria (date of search, language, type of document) for the search | 6 |
| Time period | 8 | The period that the review covers and the justification | 6 |
| Eligibility criteria | 9 | Describe all inclusion and exclusion criteria, languages, study design, type of publication, and time period | 6 |
| Data refinement (data selection procedure) | 10 | Remove the irrelevant articles; inspection to eliminate duplicate and unrelated articles (after evaluation of the title, abstract, and content) | 6 |
| Quality assessment (optional) | 11 | Assessment of papers by three authors and the use of assessing checklists |  |
| Data synthesis | 12 | Describe the methods used for summarizing, handling, synthesis, tabulations, or schematic displays. Describe how the data were analyzed | 6-7 |
| **Results** | Descriptive findings (statistics) | 13 | - Provide details of the search and selection process in a flow diagram  - Number of citations retrieved (number of publication, year of publication, type of documents, country of publication, articles with the highest impact, most impactful authors, most impactful articles, authors with the highest production, top journals, top institutions, …) | 7-13 |
| Schematic map and trend | 14 | Summarize and/or present the schematic maps and trends using an appropriate software to present citations, journals, authors, top journals, time trends, emerging literature, and any relevant indicators (as applicable) | the Figures and Tables files |
| Tabulation and summarizing the findings | 15 | General recommendation: Studies under consideration could be summarized and organized by different subtitles and different scenarios. Regardless, results need to be presented in separate tables covering each subtitle. The followings are some options that could help to summarize the findings  Option 1:  - Start the presentation with a historical view [when and who first published on the topic]  - Report on review papers. The result should be listed in a separate table. Also, specify the review type (scoping review, narrative review, systematic review, and meta-analysis)  - Summarize the findings according to the study designs and main study types  Option 2:  - Start the presentation with a historical view [when and who first published on the topic]  - Report on review papers. The result should be listed in a separate table. Also, indicate the review type (scoping review, narrative review, systematic review, and meta-analysis) should be specified  - Summarize the findings according to outcome measures or populations.  For example, see  Option 3:  - Start the presentation with a historical view [when and who first published on the topic]  - Report on review papers. The result should be listed in a separate table. Also, specify the review type (scoping review, narrative review, systematic review, and meta-analysis)  - Summarize the findings according to concept  Option 4:  - Start the presentation with a historical view [when and who first published on the topic]  - Report on review papers. The result should be listed in a separate table,  and also specify the review type (scoping review, narrative review, systematic review, and meta-analysis)  - Summarize the findings according to different subtitles relevant to the main topic | 7-13 |
| Synthesis of findings Synthesize the findings as much as possible, find the gap, and propose a model, | 16 | Synthesize the findings as much as possible, find the gap, and propose a model, hypothesis, etc. (if applicable) | 7-13 |
| **Discussion** | Summary of evidence | 17 | Summarize the main findings. The findings should be presented in more “general” or “accessible” terms | 13-16 |
| Interpretation | 18 | Include interpretation consistent with results. Explanations for observed outcomes, similarities, and differences reported would be essential | 13-26 |
| Strengths and limitations | 19 | Discuss the strengths and limitations | 27 |
| Conclusion(s) | 20 | Provide a general interpretation of the results with respect to the review questions and objectives, as well as potential implications | 27-28 |

**Table S2** Top 10 highly citations Institutions Publishing Studies on PL

| Rank | Institution | Citations | Publications | Country |
| --- | --- | --- | --- | --- |
| 1 | University of Toronto | 981 | 26 | Canada |
| 2 | The University of Queensland | 904 | 35 | Australia |
| 3 | University of Canberra | 886 | 19 | Australia |
| 4 | McMaster University | 838 | 19 | Canada |
| 5 | Macquarie University | 826 | 20 | Australia |
| 6 | Children's Hospital of Eastern Ontario | 825 | 22 | Canada |
| 7 | University of Manitoba | 800 | 25 | Canada |
| 8 | Cardiff Metropolitan University | 757 | 15 | England |
| 9 | University of Ottawa | 755 | 24 | Canada |
| 10 | The Chinese University of Hong Kong | 627 | 46 | China |

**Table S3** Top 10 most frequently Co-cited Journals Publishing Studies on PL

| Rank | Journal | Citations | IF 2023 | Quartile in category |
| --- | --- | --- | --- | --- |
| 1 | BMC Public Health (England) | 1214 | 3.5 | Q1 |
| 2 | Sports Medicine (New Zealand) | 1146 | 9.3 | Q1 |
| 3 | Journal of Teaching in Physical Education (USA) | 995 | 1.8 | Q2 |
| 4 | International Journal of environmental Research and Public Health (Switzerland) | 757 | 4.614  (IF 2021) | Q1 |
| 5 | Research Quarterly for Exercise and Sport (USA) | 544 | 1.4 | Q3 |
| 6 | International Journal of Behavioral Nutrition and Physical Activity (England) | 512 | 5.6 | Q1 |
| 7 | Medicine and Science in Sports and Exercise (USA) | 509 | 4.1 | Q1 |
| 8 | Journal of Sport and Health Science (China) | 479 | 9.7 | Q1 |
| 9 | Quest (USA) | 479 | 1.6 | Q2 |
| 10 | Sport Education and Society (England) | 442 | 2.3 | Q1 |

**Table S4** Top 10 highly co-cited references from Citespace

| Rank | Title | 1st author  (year) | Citations |
| --- | --- | --- | --- |
| 1 | Physical literacy, physical activity and health: Toward an evidence-informed conceptual model | Cairney J (2019) | 200 |
| 2 | Definitions, foundations and associations of physical literacy: a systematic review | Edwards LC (2017) | 141 |
| 3 | 'Measuring' physical literacy and related constructs: a systematic review of empirical findings | Edwards LC (2018) | 102 |
| 4 | Physical literacy, physical activity, and health indicators in school-age children | Caldwell HAT (2020) | 74 |
| 5 | Defining physical literacy for application in Australia: a modified Delphi method | Keegan RJ (2019) | 68 |
| 6 | Physical literacy across the world | Whitehead M (2019) | 63 |
| 7 | Physical literacy: a concept analysis | Young LS (2020) | 60 |
| 8 | Understanding physical literacy in the context of health: a rapid scoping review | Cornish K (2020) | 56 |
| 9 | Canada's physical literacy consensus statement: process and outcome | Tremblay MS (2018) | 53 |
| 10 | Canadian Assessment of Physical Literacy Second Edition: a streamlined assessment of the capacity for physical activity among children 8 to 12 years of age | Longmuir PE (2018) | 53 |

**Table S5** Top 10 highly co-cited references in Clusters #0 from Citespace

| Rank | Title | 1st author  (year) | Citations |
| --- | --- | --- | --- |
| 1 | Physical literacy, physical activity and health: Toward an evidence-informed conceptual model | Cairney J (2019) | 200 |
| 2 | Physical literacy, physical activity, and health indicators in school-age children | Caldwell HAT (2020) | 74 |
| 3 | Defining physical literacy for application in Australia: a modified Delphi method | Keegan RJ (2019) | 68 |
| 4 | Physical literacy across the world | Whitehead M (2019) | 63 |
| 5 | Understanding physical literacy in the context of health: a rapid scoping review | Cornish K (2020) | 56 |
| 6 | Assessments related to the physical, affective and cognitive domains of physical literacy amongst children aged 7–11.9 years: a systematic review | Shearer C (2021) | 38 |
| 7 | International approaches to the definition, philosophical tenets, and core elements of physical literacy: A scoping review | Martins J (2021) | 36 |
| 8 | The Impact of Circus Arts Instruction in Physical Education on the Physical Literacy of Children in Grades 4 and 5 | Kriellaars DJ (2019) | 36 |
| 9 | Global trends in insufficient physical activity among adolescents: a pooled analysis of 298 population-based surveys with 1· 6 million participants | Guthold R (2020) | 36 |
| 10 | The Effectiveness of Physical Literacy Interventions: A Systematic Review with Meta-Analysis | Carl J (2022) | 32 |

**Table S6** Top 10 highly co-cited references in Clusters #1 from Citespace

| Rank | Title | 1st author  (year) | Citations |
| --- | --- | --- | --- |
| 1 | Definitions, foundations and associations of physical literacy: a systematic review | Edwards LC (2017) | 141 |
| 2 | 'Measuring' physical literacy and related constructs: a systematic review of empirical findings | Edwards LC (2018) | 102 |
| 3 | Physical literacy: a concept analysis | Young LS (2020) | 60 |
| 4 | How is physical literacy defined? A contemporary update | Shearer C (2018) | 48 |
| 5 | Critical considerations for physical literacy policy in public health, recreation, sport, and education agencies | Dudley D (2017) | 48 |
| 6 | Implications of physical literacy for research and practice: A commentary | Corbin CB (2016) | 42 |
| 7 | Physical literacy in children and adolescents: Definitions, assessments, and interventions | Liu Y (2021) | 42 |
| 8 | Charting physical literacy journeys within physical education settings | Green NR (2018) | 41 |
| 9 | What's in a concept? A Leximancer text mining analysis of physical literacy across the international literature | Hyndman B (2018) | 36 |
| 10 | Defining physical literacy: making sense of a promiscuous concept | Bailey R (2022) | 36 |

**Table S7** Top 10 highly co-cited references in Clusters #2 from Citespace

| Rank | Title | 1st author  (year) | Citations |
| --- | --- | --- | --- |
| 1 | Physical literacy measurement the missing piece | Tremblay Mark S (2010) | 6 |
| 2 | Fitness of Canadian children and youth: results from the 2007-2009 Canadian Health Measures Survey | Tremblay Mark S (2010) | 2 |
| 3 | The association between walking to school, daily step counts and meeting step targets in 5-to 17-year-old Australian children | Abbott RA (2009) | 1 |
| 4 | A comparison of indirect versus direct measures for assessing physical activity in the pediatric population: a systematic review | Adamo KB (2009) | 1 |
| 5 | Advancing the debate on 'fitness testing' for children: perhaps we're riding the wrong animal | Lloyd M (2010) | 4 |
| 6 | Leisure‐time physical activity alone may not be a sufficient public health approach to prevent obesity–a focus on China | Bauman A (2008) | 1 |
| 7 | An ecological approach to creating active living communities | Sallis JE (2006) | 1 |
| 8 | The measurement and interpretation of children's physical activity | Rowlands AV (2007) | 1 |
| 9 | Development and Reproducibility of a Tool to Assess School Nutrition Environments | Davison Kirsten K (2008) | 1 |
| 10 | Associations between active commuting to school, fat mass and lifestyle factors in adolescents: the Kiel Obesity Prevention Study (KOPS) | Landsberg B (2008) | 1 |

**Table S8** Top 10 highly co-cited references in Clusters #4 from Citespace

| Rank | Title | 1st author  (year) | Citations |
| --- | --- | --- | --- |
| 1 | Physical literacy: importance, assessment and future directions | Giblin S (2014) | 30 |
| 2 | A conceptual model of observed physical literacy | Dudley DA (2015) | 26 |
| 3 | Physical literacy in the field of physical education–A challenge and a possibility | Lundvall S (2015) | 23 |
| 4 | Motor competence and its effect on positive developmental trajectories of health | Robinson LE (2015) | 18 |
| 5 | Unpacking the physical literacy concept for K-12 physical education: What should we expect the learner to master? | Roetert EP (2015) | 14 |
| 6 | Physical literacy and comprehensive school physical activity programs | Castelli DM (2014) | 9 |
| 7 | Embracing physical literacy | Roetert EP (2014) | 8 |
| 8 | Teaching for physical literacy: Implications to instructional design and PETE | Silverman S (2015) | 8 |
| 9 | Knowledge, transfer, and innovation in physical literacy curricula | Ennis CD (2015) | 7 |
| 10 | Physical literacy: Throughout the lifecourse | Whitehead M (2010) | 6 |

**Table S9** Top 10 highly co-cited references in Clusters #5 from Citespace

| Rank | Title | 1st author  (year) | Citations |
| --- | --- | --- | --- |
| 1 | Canada's physical literacy consensus statement: process and outcome | Tremblay MS (2018) | 53 |
| 2 | Canadian Assessment of Physical Literacy Second Edition: a streamlined assessment of the capacity for physical activity among children 8 to 12 years of age | Longmuir PE (2018) | 53 |
| 3 | The relationship between physical literacy scores and adherence to Canadian physical activity and sedentary behaviour guidelines | Belanger K (2018) | 50 |
| 4 | The Canadian assessment of physical literacy: methods for children in grades 4 to 6 (8 to 12 years) | Longmuir PE (2015) | 49 |
| 5 | Physical literacy levels of Canadian children aged 8–12 years: Descriptive and normative results from the RBC Learn to Play–CAPL project | Tremblay MS (2018) | 47 |
| 6 | The Canadian assessment of physical literacy: development of a model of children's capacity for a healthy, active lifestyle through a Delphi process | Francis CE (2016) | 37 |
| 7 | Physical Literacy Knowledge Questionnaire: feasibility, validity, and reliability for Canadian children aged 8 to 12 years | Longmuir PE (2018) | 33 |
| 8 | Refining the Canadian Assessment of Physical Literacy based on theory and factor analyses | Gunnell KE (2018) | 31 |
| 9 | Marking physical literacy or missing the mark on physical literacy? A conceptual critique of Canada's physical literacy assessment instruments | Robinson DB (2017) | 31 |
| 10 | Canadian Agility and Movement Skill Assessment (CAMSA): Validity, objectivity, and reliability evidence for children 8–12 years of age | Longmuir PE (2017) | 28 |

**Table S10** Top 10 highly co-cited references in Clusters #6 from Citespace

| Rank | Title | 1st author  (year) | Citations |
| --- | --- | --- | --- |
| 1 | Physical activity of Canadian children and youth: accelerometer results from the 2007 to 2009 Canadian Health Measures Survey | Colley Rachel C (2011) | 3 |
| 2 | Quality control and data reduction procedures for accelerometry-derived measures of physical activity | Colley Rachel (2010) | 2 |
| 3 | Advancing the debate on 'fitness testing' for children: perhaps we're riding the wrong animal | Lloyd M (2010) | 2 |
| 4 | A model of knowledge translation in health: the Active Healthy Kids Canada Report Card on physical activity for children and youth | Colley RC (2012) | 1 |
| 5 | Physical activity of Canadian adults: accelerometer results from the 2007 to 2009 Canadian Health Measures Survey. | Colley Rachel C (2011) | 1 |
| 6 | Last child in the woods: Saving our children from nature-deficit disorder | Louv R (2008) | 1 |
| 7 | Prevalence and secular changes in abdominal obesity in Canadian adolescents and adults, 1981 to 2007–2009 | Janssen I (2011) | 1 |
| 8 | Long-term impact of overweight and obesity in childhood and adolescence on morbidity and premature mortality in adulthood: systematic review | Reilly JJ (2011) | 1 |
| 9 | Partnerships between health organizations and the food industry risk derailing public health nutrition | Freedhoff Y (2011) | 1 |
| 10 | Physiological and health implications of a sedentary lifestyle | Tremblay MS (2010) | 1 |

**Table S11** Top 20 references with the newest citation bursts

| Burst years | Burst | Title |
| --- | --- | --- |
| 2022-2024 | 7.14 | Measurement properties of the Physical Literacy Assessment for Youth (PLAY) tools |
| 5.89 | Holistic physical exercise training improves physical literacy among physically inactive adults: a pilot intervention study |
| 4.95 | Global action plan on physical activity 2018-2030: more active people for a healthier world |
| 3.85 | International approaches to the definition, philosophical tenets, and core elements of physical literacy: A scoping review |
| 3.85 | Global trends in insufficient physical activity among adolescents: a pooled analysis of 298 population-based surveys with 1.6 million participants |
| 3.85 | One size fits all? What counts as quality practice in (reflexive) thematic analysis? |
| 3.72 | Physical Literacy, Physical Activity, and Health Indicators in School-Age Children  Implications for Promoting Physical Literacy |
| 3.56 | Implications for promoting physical literacy |
| 3.17 | Psychometric properties and construct validity of PLAYself: a self-reported measure of physical literacy for children and youth |
| 2021-2024 | 3.03 | Physical Literacy (Mis)understandings: What do Leading Physical Education Teachers Know About Physical Literacy? |
| 2020-2024 | 4.79 | The relationship between physical literacy scores and adherence to Canadian physical activity and sedentary behaviour guidelines |
| 2021-2022 | 7.14 | The value of fostering physical literacy |
| 6.91 | Understanding community-based participatory research through a social movement framework: a case study of the Kahnawake Schools Diabetes Prevention Project |
| 5.26 | Relationship between perceived physical literacy and physical activity levels among Hong Kong adolescents |
| 5.14 | Physical literacy levels of Canadian children aged 8-12 years: descriptive and normative results from the RBC Learn to Play-CAPL project |
| 3.74 | Examining the Impact of a Teaching Games for Understanding Approach on the Development of Physical Literacy Using the Passport for Life Assessment Tool |
| 3.44 | What's in a concept? A Leximancer text mining analysis of physical literacy across the international literature |
| 2020-2022 | 6.18 | Canadian Assessment of Physical Literacy Second Edition: a streamlined assessment of the capacity for physical activity among children 8 to 12 years of age |
| 5.31 | Guidelines for the Selection of Physical Literacy Measures in Physical Education in Australia |
| 5.29 | Canadian Agility and Movement Skill Assessment (CAMSA): Validity, objectivity, and reliability evidence for children 8-12 years of age |
